# Supplementary material
Source: PubMed Central journal article supplement (PMC4325798)
Supplement: AAC.03919-14_zac003153782so1.pdf [file AAC.03919-14_zac003153782so1.pdf]

**Supplementary table S1:** Estimated pharmacodynamic growth parameters (along with standard errors) of 50 *E. coli* strains from *in vitro* growth experiments.

| Strains | MIC    | $\alpha_{max}$ | $\gamma$ | $EC_{50}$ | $\alpha_{max\_s.e}$ | $\gamma\_s.e$ | $EC_{50\_s.e}$ |
|---------|--------|----------------|----------|-----------|---------------------|---------------|----------------|
| 1       | 0.50   | 1.72           | 2.52     | 0.23      | 0.04                | 0.32          | 0.01           |
| 2       | 0.50   | 1.75           | 1.95     | 0.17      | 0.05                | 0.20          | 0.01           |
| 3       | 0.50   | 1.47           | 5.43     | 0.29      | 0.06                | 2.44          | 0.02           |
| 4       | 0.50   | 1.81           | 1.39     | 0.18      | 0.05                | 0.11          | 0.01           |
| 5       | 0.25   | 1.84           | 1.58     | 0.18      | 0.05                | 0.15          | 0.01           |
| 6       | 0.50   | 1.67           | 2.61     | 0.20      | 0.03                | 0.24          | 0.01           |
| 7       | 2.00   | 2.03           | 8.35     | 1.14      | 0.02                | 3.52          | 0.06           |
| 8       | 0.50   | 1.80           | 1.60     | 0.23      | 0.04                | 0.12          | 0.01           |
| 9       | 0.50   | 1.69           | 1.93     | 0.16      | 0.04                | 0.18          | 0.01           |
| 10      | 0.50   | 1.65           | 1.90     | 0.15      | 0.04                | 0.16          | 0.01           |
| 11      | 0.50   | 2.03           | 2.22     | 0.18      | 0.04                | 0.18          | 0.01           |
| 12      | 0.50   | 1.68           | 2.80     | 0.22      | 0.04                | 0.31          | 0.01           |
| 13      | 0.50   | 1.92           | 2.24     | 0.18      | 0.04                | 0.19          | 0.01           |
| 14      | 0.50   | 1.69           | 2.09     | 0.18      | 0.04                | 0.21          | 0.01           |
| 15      | 0.25   | 1.66           | 1.68     | 0.11      | 0.03                | 0.10          | 0.00           |
| 16      | 0.50   | 1.73           | 1.68     | 0.14      | 0.05                | 0.15          | 0.01           |
| 17      | 8.00   | 1.87           | 7.62     | 4.31      | 0.06                | 13.73         | 0.61           |
| 18      | 0.50   | 1.80           | 1.88     | 0.15      | 0.05                | 0.17          | 0.01           |
| 19      | 0.50   | 1.90           | 2.04     | 0.17      | 0.05                | 0.21          | 0.01           |
| 20      | 0.50   | 1.92           | 1.62     | 0.17      | 0.07                | 0.19          | 0.02           |
| 21      | 0.25   | 2.02           | 1.80     | 0.14      | 0.06                | 0.20          | 0.01           |
| 22      | 0.25   | 1.84           | 1.69     | 0.14      | 0.06                | 0.18          | 0.01           |
| 23      | 0.50   | 1.92           | 1.72     | 0.14      | 0.05                | 0.15          | 0.01           |
| 24      | 0.50   | 1.89           | 1.52     | 0.15      | 0.07                | 0.17          | 0.01           |
| 25      | 0.25   | 1.96           | 3.14     | 0.11      | 0.07                | 0.55          | 0.01           |
| 26      | 0.50   | 1.95           | 1.55     | 0.22      | 0.05                | 0.12          | 0.01           |
| 27      | 0.50   | 1.88           | 1.62     | 0.12      | 0.06                | 0.15          | 0.01           |
| 28      | 0.25   | 1.60           | 1.83     | 0.11      | 0.06                | 0.21          | 0.01           |
| 29      | 0.50   | 1.84           | 1.89     | 0.15      | 0.05                | 0.19          | 0.01           |
| 30      | 0.50   | 1.79           | 1.44     | 0.14      | 0.09                | 0.20          | 0.02           |
| 31      | 0.50   | 2.03           | 1.58     | 0.16      | 0.07                | 0.17          | 0.01           |
| 32      | 0.50   | 1.96           | 1.68     | 0.18      | 0.06                | 0.17          | 0.01           |
| 33      | 64.00  | 1.73           | 4.23     | 30.05     | 0.04                | 1.35          | 1.90           |
| 34      | 128.00 | 1.96           | 10.00    | 75.37     | 0.02                | 6.97          | 8.64           |
| 35      | 32.00  | 1.85           | 4.73     | 16.05     | 0.06                | 2.20          | 1.00           |
| 36      | 16.00  | 1.90           | 10.00    | 10.86     | 0.01                | 1.06          | 0.37           |
| 37      | 512.00 | 1.87           | 3.99     | 186.89    | 0.01                | 0.84          | 15.76          |
| 38      | 32.00  | 1.80           | 6.42     | 33.42     | 0.06                | 6.72          | 2.21           |

|           |        |      |       |       |      |       |       |
|-----------|--------|------|-------|-------|------|-------|-------|
| <b>39</b> | 32.00  | 1.88 | 10.00 | 18.73 | 0.02 | 6.85  | 2.04  |
| <b>40</b> | 16.00  | 1.76 | 10.00 | 17.12 | 0.06 | 66.37 | 7.72  |
| <b>41</b> | 64.00  | 1.97 | 8.23  | 67.47 | 0.06 | 22.19 | 9.90  |
| <b>42</b> | 32.00  | 1.38 | 2.13  | 14.20 | 0.02 | 0.21  | 0.76  |
| <b>43</b> | 64.00  | 1.88 | 6.94  | 35.88 | 0.02 | 1.88  | 1.21  |
| <b>44</b> | 16.00  | 1.75 | 10.00 | 9.78  | 0.01 | 2.65  | 0.53  |
| <b>45</b> | 128.00 | 1.82 | 8.62  | 68.27 | 0.06 | 27.57 | 14.30 |
| <b>46</b> | 32.00  | 1.92 | 6.63  | 16.70 | 0.06 | 7.73  | 1.13  |
| <b>47</b> | 64.00  | 1.72 | 10.00 | 82.29 | 0.01 | 1.59  | 3.40  |
| <b>48</b> | 0.25   | 1.97 | 2.46  | 0.10  | 0.05 | 0.25  | 0.00  |
| <b>49</b> | 64.00  | 1.84 | 8.13  | 36.91 | 0.02 | 3.56  | 2.36  |
| <b>50</b> | 128.00 | 1.86 | 10.00 | 82.43 | 0.01 | 2.12  | 4.57  |
